# Supplementary material for: Exploring the preferential interaction of quercetin with VEGF promoter G-quadruplex DNA and construction of a pH-dependent DNA-based logic gate
Source: Royal Society of Chemistry journal article supplement (doi:10.1039/c7ra05930b), 2017-01-01
Supplement: c7ra05930b1.pdf [file c7ra05930b1.pdf]

**Supplementary Information**

**Exploring the preferential interaction of quercetin with VEGF promoter G-quadruplex DNA and construction of pH-dependent DNA-based logic gate**

**Snehasish Bhattacharjee, Pradeep K. Sengupta and Sudipta Bhowmik\***

**Department of Biophysics, Molecular Biology and Bioinformatics, University of Calcutta,  
Kolkata-700009, India**

**Corresponding author: Dr. Sudipta Bhowmik, e-mail: [su\\_sudipta@yahoo.co.in](mailto:su_sudipta@yahoo.co.in)**

**Table S1:**

| <b>Oligo Name</b> | <b>Length (bases)</b> | <b>Sequence (5'-3')</b>       |
|-------------------|-----------------------|-------------------------------|
| VEGF              | 24                    | d(CCGGGGCGGGCCGGGGGCGGGGTC)   |
| c-MYC             | 22                    | d(TGAGGGTGGGTAGGGTGGGTAA)     |
| c-KIT1            | 22                    | d(GGGAGGGCGCTGGGAGGGAGGG)     |
| c-KIT2            | 20                    | d(GGGCGGGCGCGAGGGAGGGG)       |
| h-TELO            | 22                    | d(AGGGTTAGGGTTAGGGTTAGGG)     |
| duplex            | 26                    | d(CAATCGGATCGAATTCGATCCGATTG) |

**Table S1:** Oligonucleotide sequences that have been studied in this research work.

**Figure S1:**

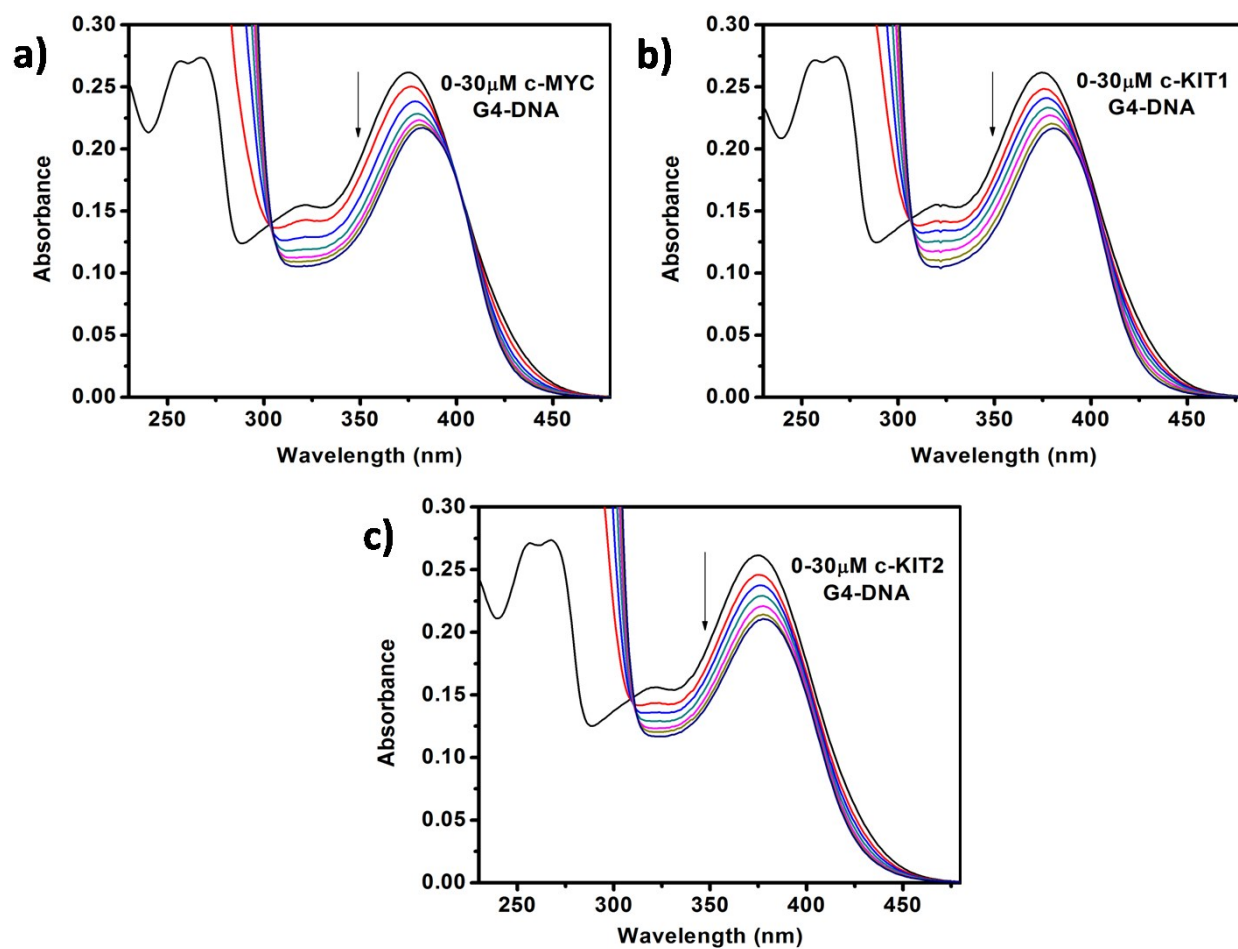

**Figure S1:** Absorption spectra of Que (15 μM) in the absence and presence of successive additions of a) c-MYC, b) c-KIT1, and c) c-KIT2 G4-DNA.

**Figure S2:**

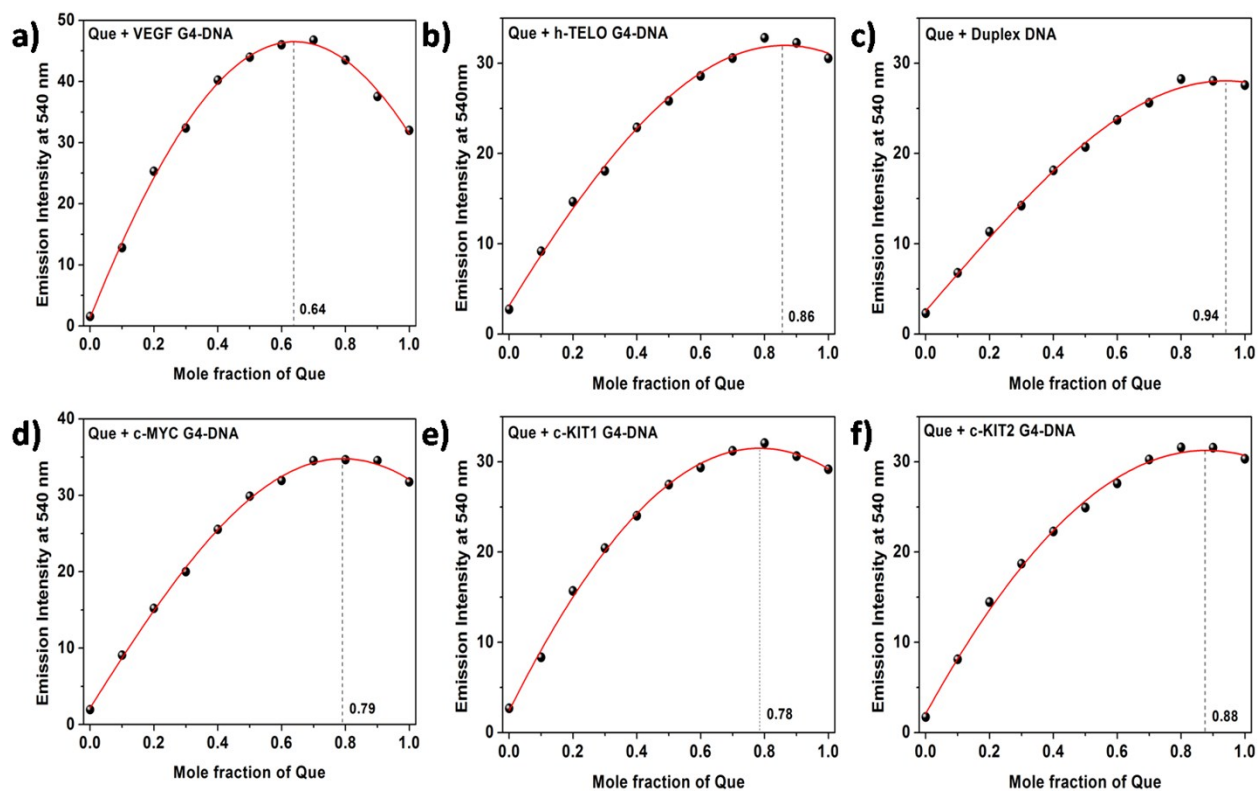

**Figure S2:** Job plot for the binding of Que to the a) VEGF G4-DNA, b) h-TELO G4-DNA, c) Duplex DNA d) c-MYC G4-DNA, e) c-KIT1 G4-DNA and f) c-KIT2 G4-DNA. Fluorescence enhancement of Que-DNA complexes was monitored at 540 nm ( $\lambda_{ex} = 370$  nm).

Figure S3:

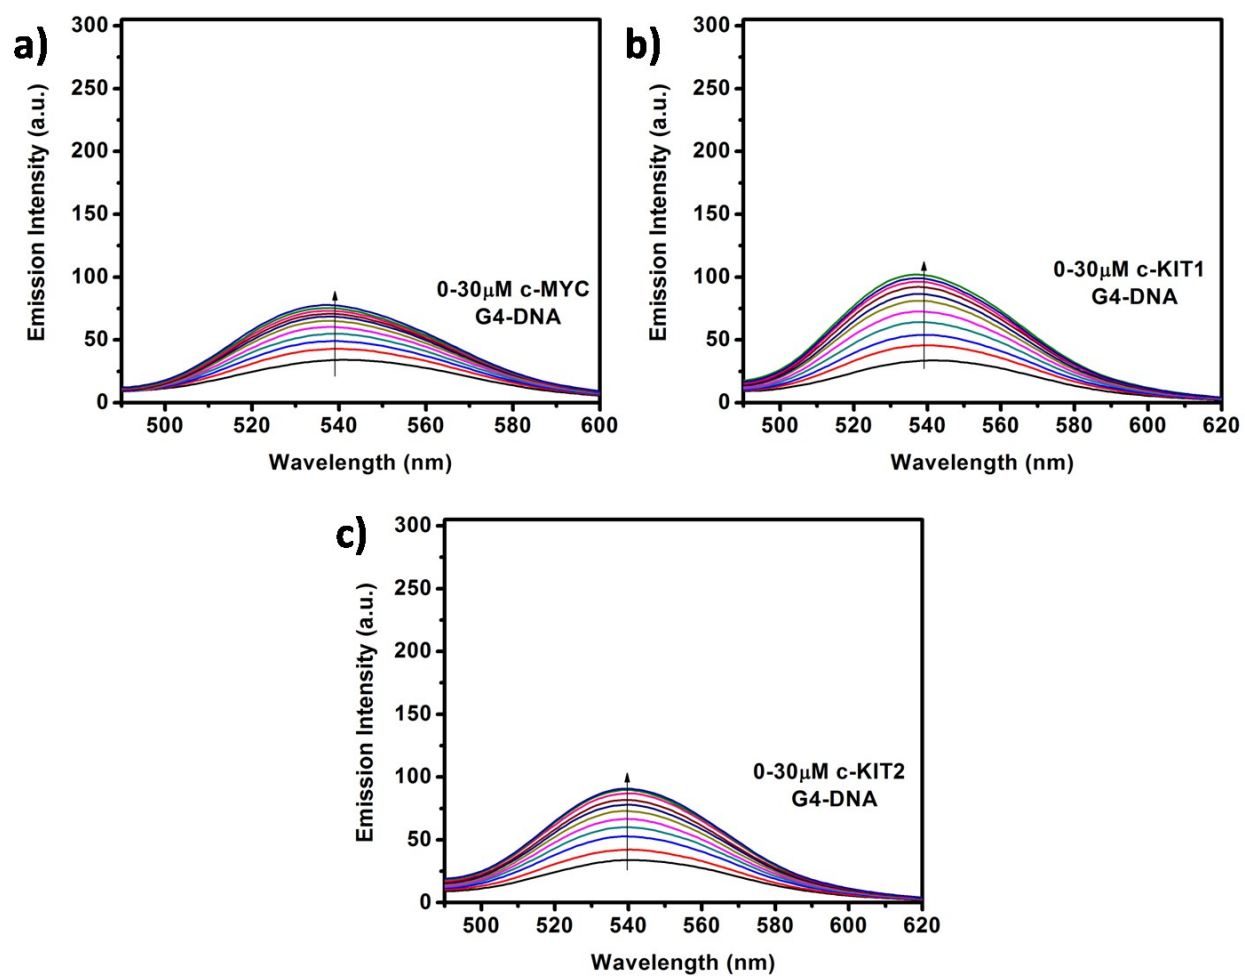

**Figure S3:** Fluorescence emission spectra of Que (10  $\mu\text{M}$ ) with increasing concentrations of a) c-MYC, b) c-KIT1 and c) c-KIT2 G4-DNA. ( $\lambda_{\text{ex}} = 370 \text{ nm}$ ).

Figure S4:

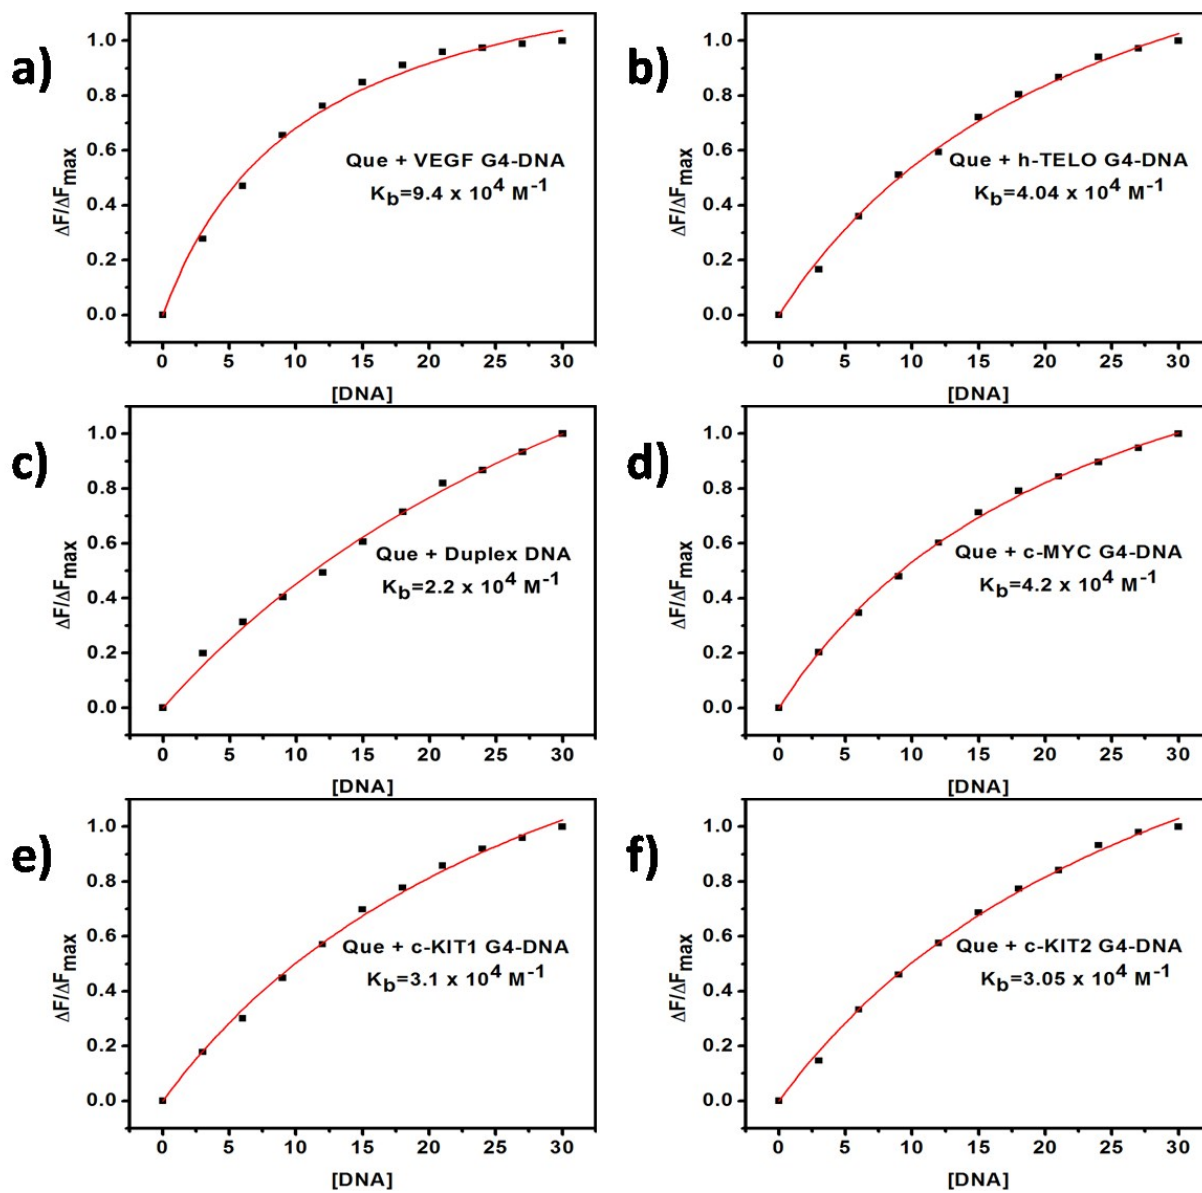

Figure S4: Binding isotherm plots to determine the binding constant ( $K_b$ ) from fluorescence titration experiment.

Figure S5:

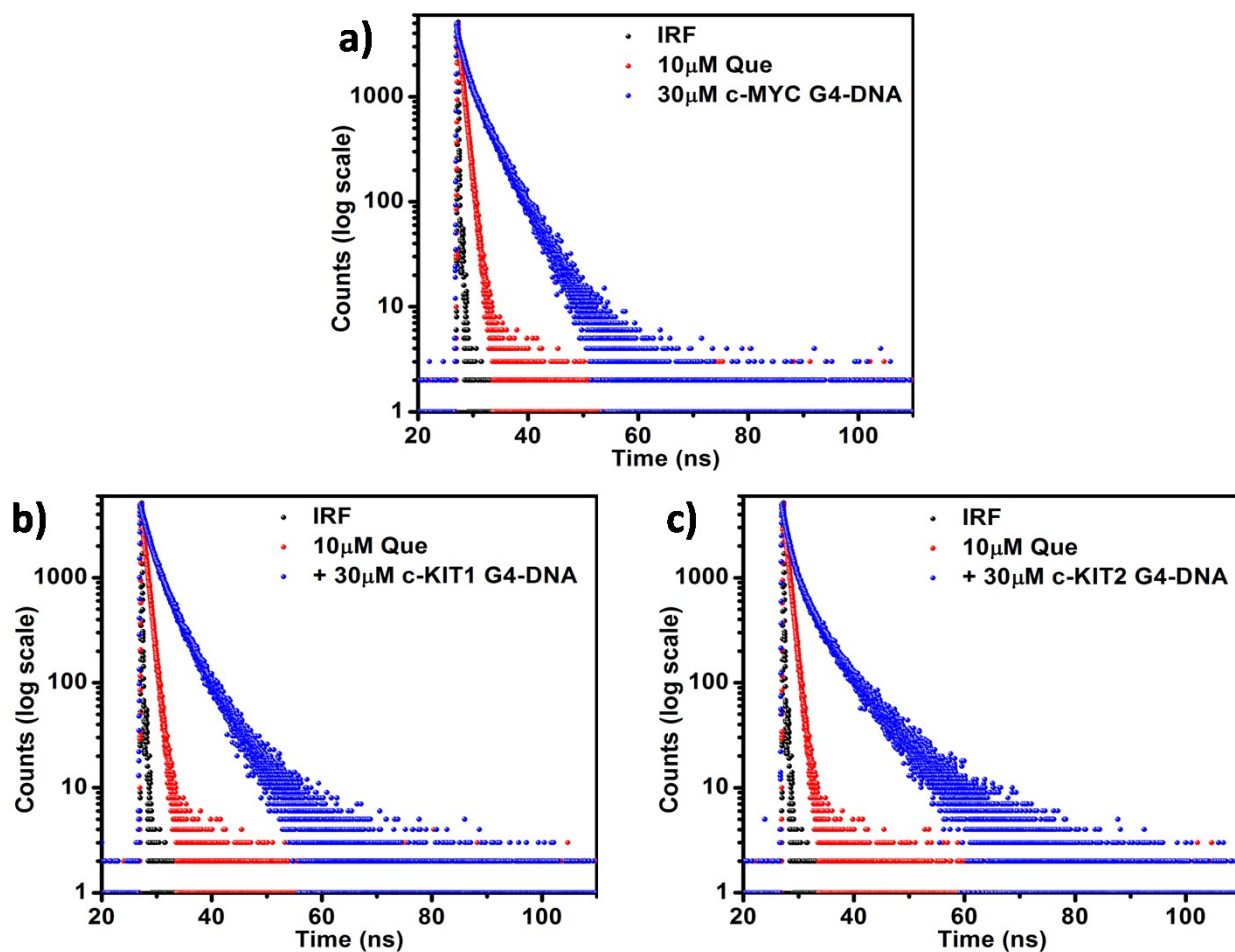

**Figure S5:** Fluorescence lifetime decay profiles of 10  $\mu\text{M}$  Que in aqueous buffer and in the presence of a) c-MYC, b) c-KIT1 and c) c-KIT2 G4-DNA. [DNA] = 30  $\mu\text{M}$ ; ( $\lambda_{\text{ex}}$  = 375 nm and  $\lambda_{\text{em}}$  = 540 nm).

Figure S6:

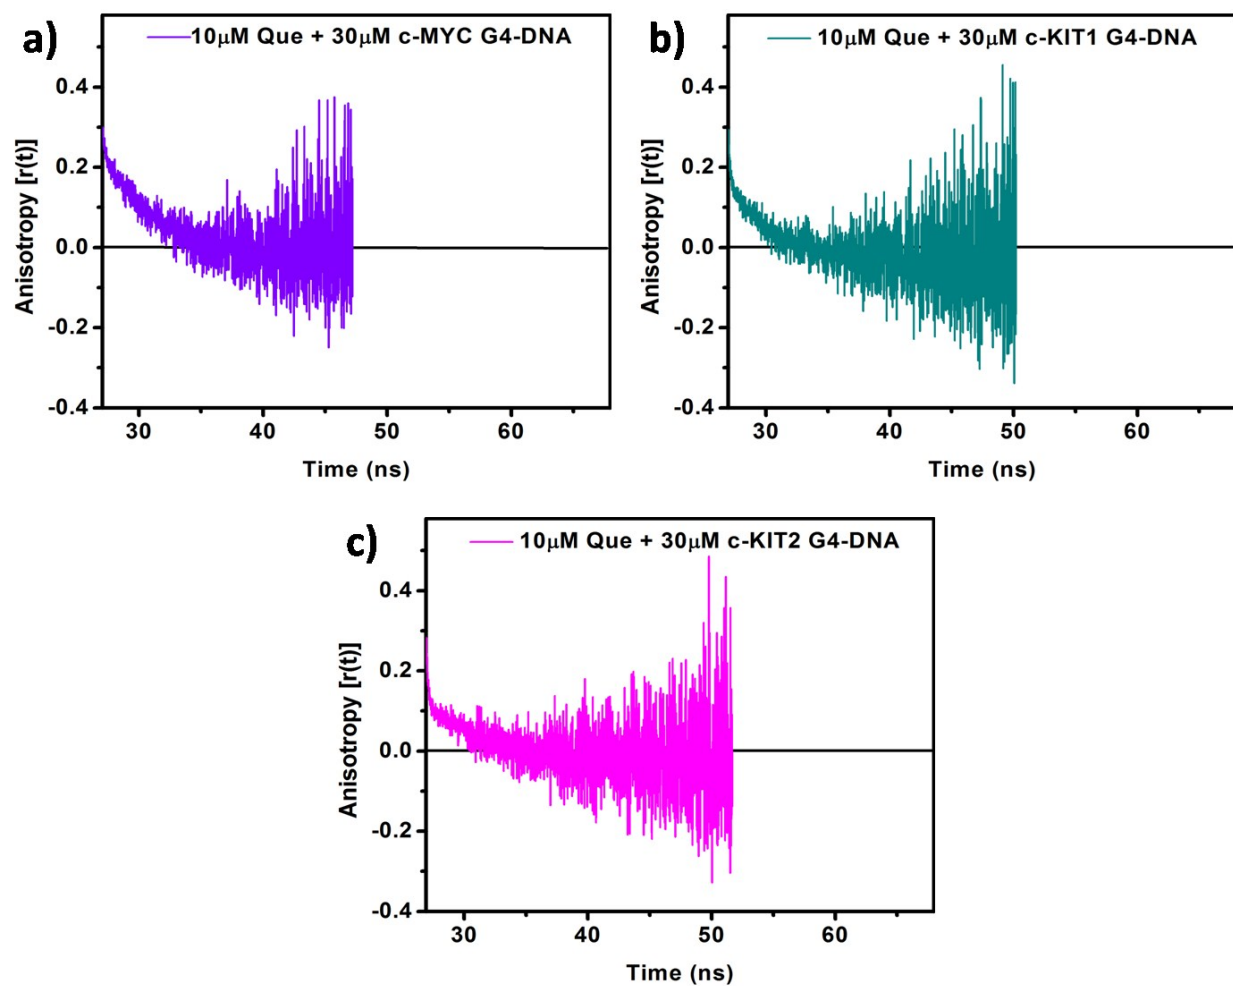

**Figure S6:** Time-resolved fluorescence anisotropy decay profiles of 10  $\mu\text{M}$  Que in the presence of a) c-MYC, b) c-KIT1, and c) c-KIT2 G4-DNA.  $[\text{DNA}] = 30 \mu\text{M}$ ; ( $\lambda_{\text{ex}} = 375 \text{ nm}$  and  $\lambda_{\text{em}} = 540 \text{ nm}$ ).



Figure S7:

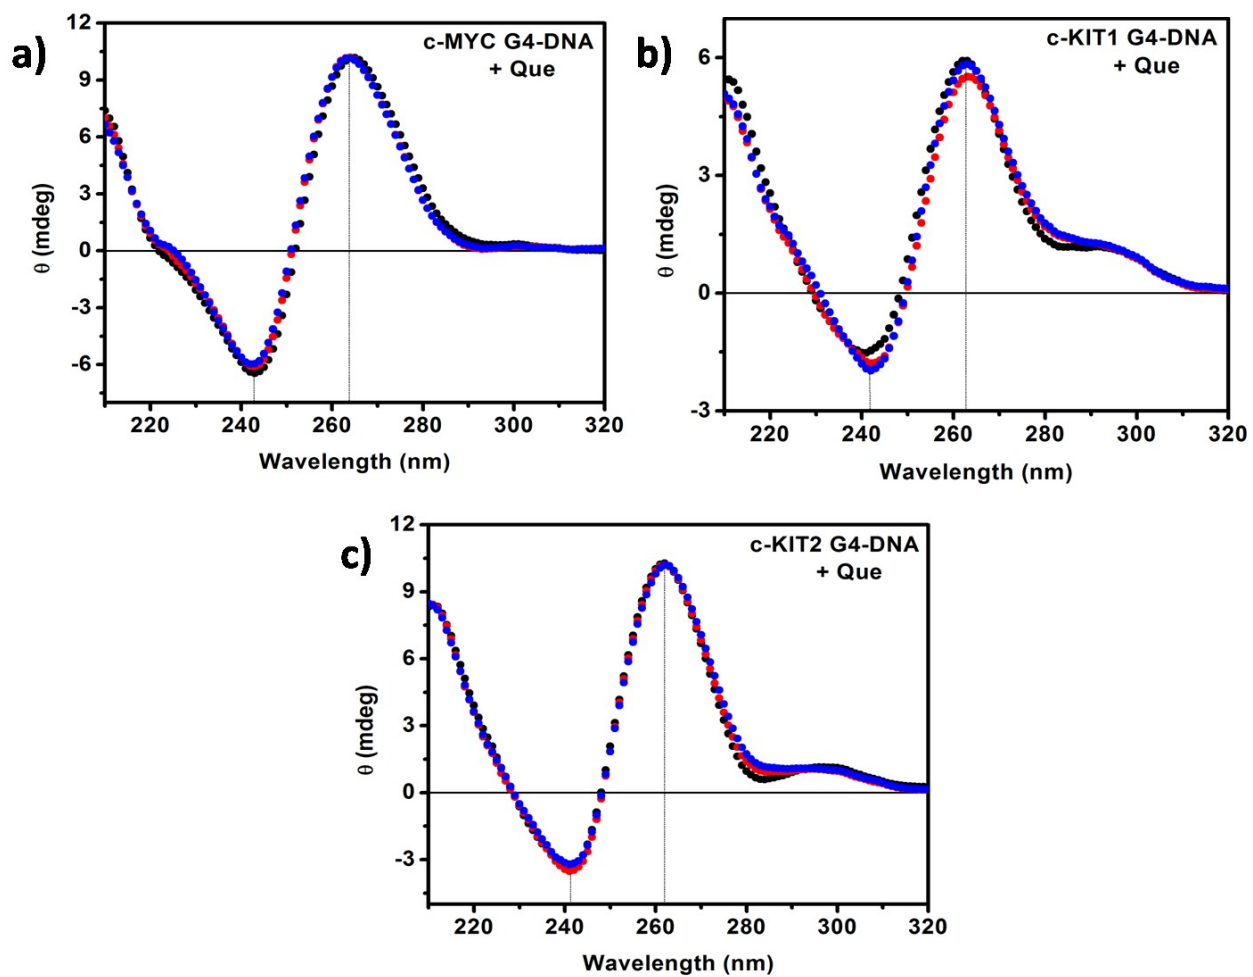

**Figure S7:** CD spectra of a) c-MYC, b) c-KIT1 and c) c-KIT2 G4-DNA in the absence (black) and presence of 50  $\mu\text{M}$  (red) and 100  $\mu\text{M}$  (blue) Que, respectively. [DNA] = 20  $\mu\text{M}$ .
